# Supplementary material
Source: publisher figshare collection journal article supplement (https://acs.figshare.com/ndownloader/files/20076782)
Supplement: Supplementary file 1 [file 20076782]

## ***Supporting Information***

### **Distinct Excited-State Dynamics of Near-Orthogonal Perylenimide Dimer: Conformational Planarization *versus* Symmetry Breaking Charge Transfer**

*Hongwei Song<sup>a,b,d</sup>, Hongmei Zhao<sup>b</sup>, Yuanyuan Guo<sup>b,d</sup>, Abbey M. Philip<sup>c</sup>, Qianjin Guo*

*<sup>a,b</sup>, Mahesh Hariharan<sup>\*c</sup>, Andong Xia<sup>\*a,b,d</sup>*

<sup>a</sup>School of Sciences, Beijing University of Posts and Telecommunications (BUPT),  
Beijing 100876, People's Republic of China

<sup>b</sup>Beijing National Laboratory for Molecular Sciences (BNLMS), Key Laboratory of  
Photochemistry, Institute of Chemistry, Chinese Academy of Sciences, Beijing 100190,  
People's Republic of China

<sup>c</sup>School of Chemistry, Indian Institute of Science Education and Research  
Thiruvananthapuram (IISER-TVM), Maruthamala P.O., Vithura, Thiruvananthapuram,  
Kerala 695551, India

<sup>d</sup>University of Chinese Academy of Sciences, Beijing 100049, People's Republic of  
China

<sup>\*</sup>Andong Xia

E-mail: andong@iccas.ac.cn

<sup>\*</sup>Mahesh Hariharan

E-mail: mahesh@iisertvm.ac.in

## **Contents**

**S1.**Materials and experimental methods

**S2.**Additional femtosecond transient absorption spectra and kinetics of selected wavelengths of P.

**S3.**Additional femtosecond transient absorption spectra and kinetics of selected wavelengths of PP.

**S4.**Additional TD-DFT calculation results

## S1. Materials and experimental methods.

The synthesis and purification of **P**, **PP** were reported previously.<sup>1,2</sup> All solvents, including CHX, ACN, were of analytical grade and used as received. Steady-state UV/vis absorption spectra were recorded on a U-3010 (Hitachi) spectrophotometer. Steady state fluorescence spectra were recorded on an F-4600 (Hitachi) fluorescence spectrometer. Transient absorption measurements with a time resolution of  $\sim 90$  fs were performed by using a homemade femtosecond broadband pump-probe setup. Briefly, a regeneratively amplified Ti:sapphire laser (Coherent Legend Elite) produced 40 fs, 500 Hz repetition rate, 1 mJ pulses at  $\sim 800$  nm (FWHM: 30 nm). Doubling 90 percent of initial 800nm pulses through a 0.5 mm thick BBO (type I) crystal generated the 400 nm pump pulse and then this pulse pump an optical parametric amplifier (TOPAS-C, Light Conversion) to prepare the final pump pulse centered at 480 nm (60 fs). The rest of the 800 nm pulse was time-delayed by a computer-controlled optical delay line and then focused onto a 2 mm-thick water cell to produce a white light continuum (WLC), which provides a usable probe spectral range between 420 nm and 950 nm selected by a bandpass filter. The white light continuum was further split into two beams as the reference and signal beams by a broadband 50/50 beamsplitter. The pump and signal beams were overlapped in time and space on a sample cell with a 1 mm beam path length, and the reference beam passed through the unexcited part of the sample. The pump power is about 70 nJ/pulse (spot size of  $\sim 120 \mu\text{m}$  in each case) during transient absorption measurements. Signal and reference beams were detected on a fiber-coupled dual-channel spectrometer (Avantes AvaSpec-2048-2-USB2).

The collected time-dependent differential absorbance  $D(t, \lambda)$  was fitted by global

analysis using R-package TIMP software with the graphical interface Glotaran.<sup>3,4</sup>

Construction of a rational model describing the population kinetics of the transient species, is critical for global analysis of transient absorption data.

## S2. Additional femtosecond transient absorption spectra and kinetics of selected wavelengths of **P**.

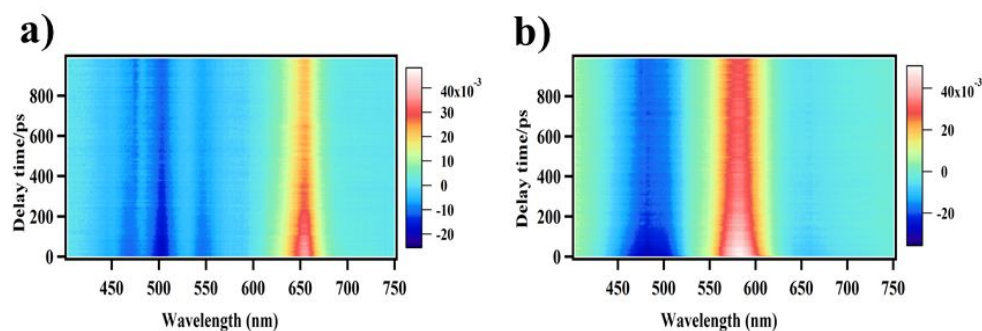

Figure S1. Transient absorption data of **P** map between 0 ps and 980 ps with pump at 480 nm in CHX (a) and ACN (b).

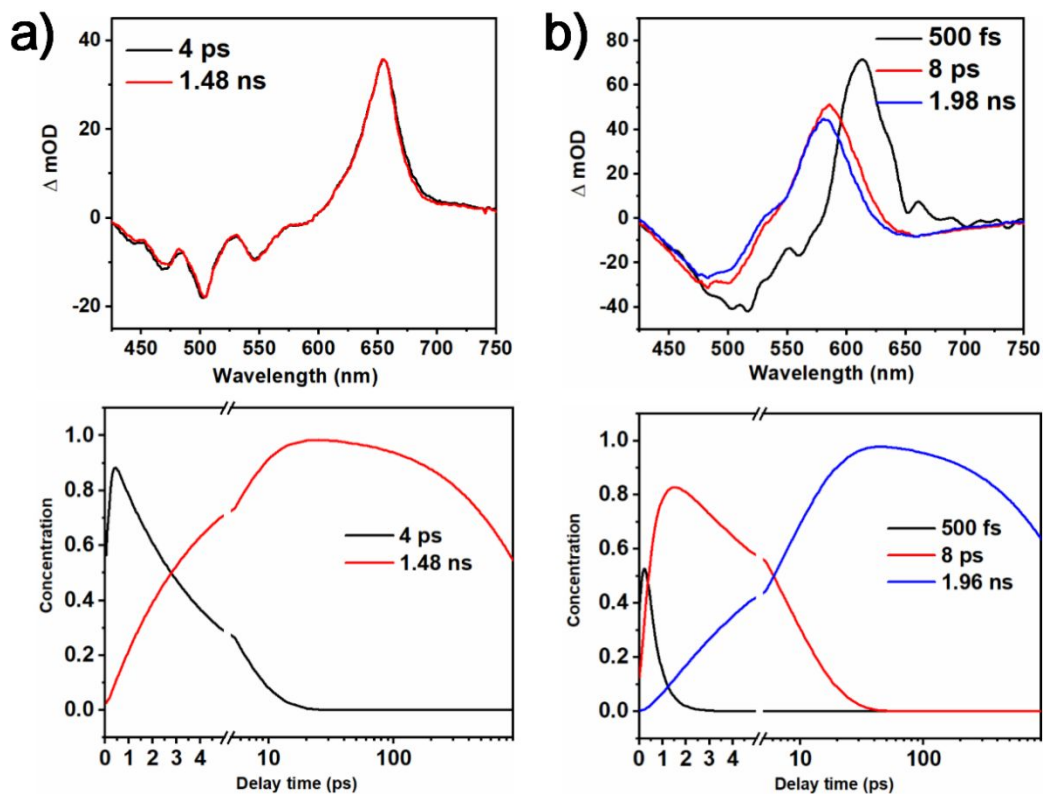

Figure S2. EADSs and the associated population evolution curves of the EADS components for monomer **P** in CHX (a) and ACN (b).

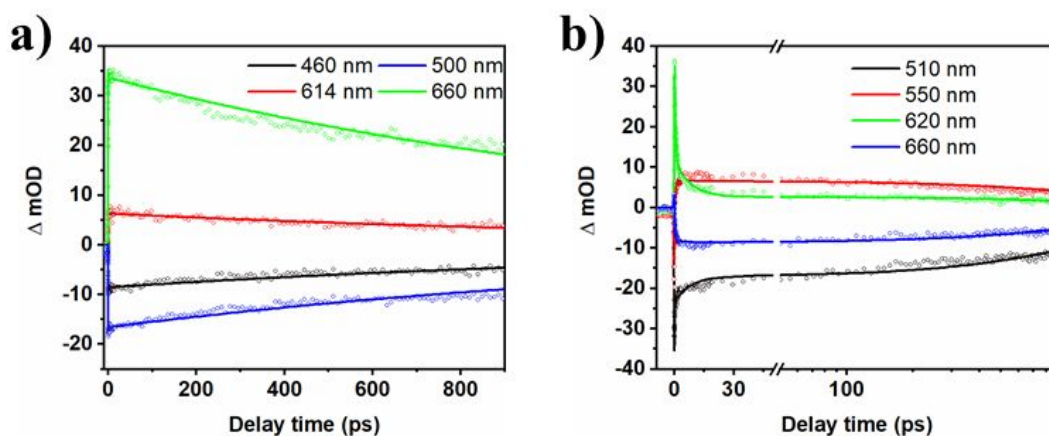

Figure S3. Plots of selected kinetic traces superimposed with matching curves at different wavelengths for **P** in CHX (a) and ACN (b).

**S3.** Additional femtosecond transient absorption spectra and kinetics of selected wavelengths of **PP**.

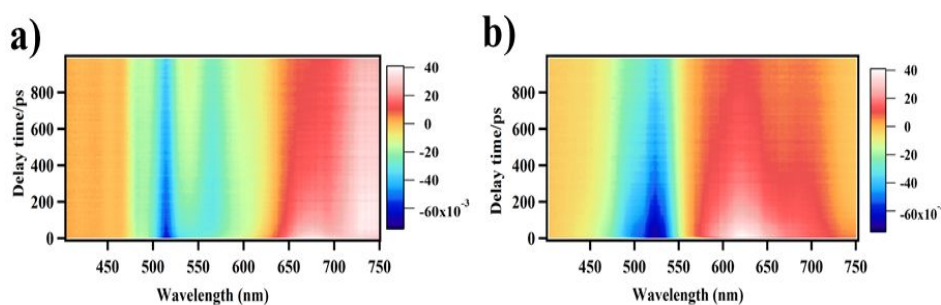

Figure S4. Transient absorption data of **PP** map between 0 ps and 980 ps with pump at 480 nm in CHX (a) and ACN (b).

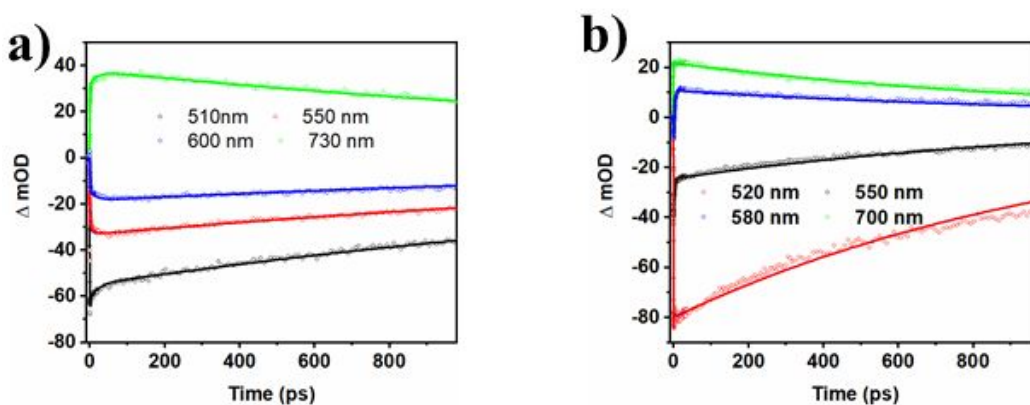

Figure S5. Plots of selected kinetic traces superimposed with matching curves at different wavelengths for **PP** in CHX (a) and ACN (b).

#### S4. Additional TD-DFT calculation results.

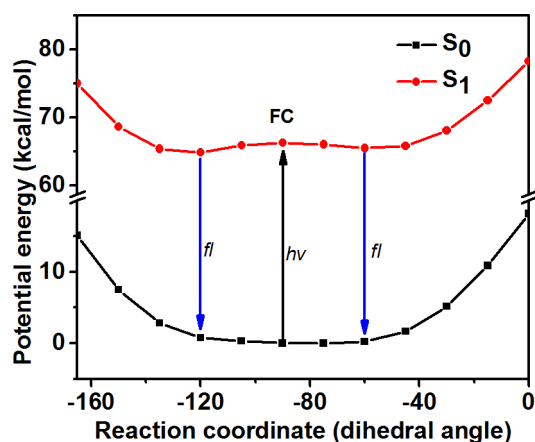

Figure S6. Energy profiles of ground state and excited state for **PP** along with the dihedral angle between two monomers.

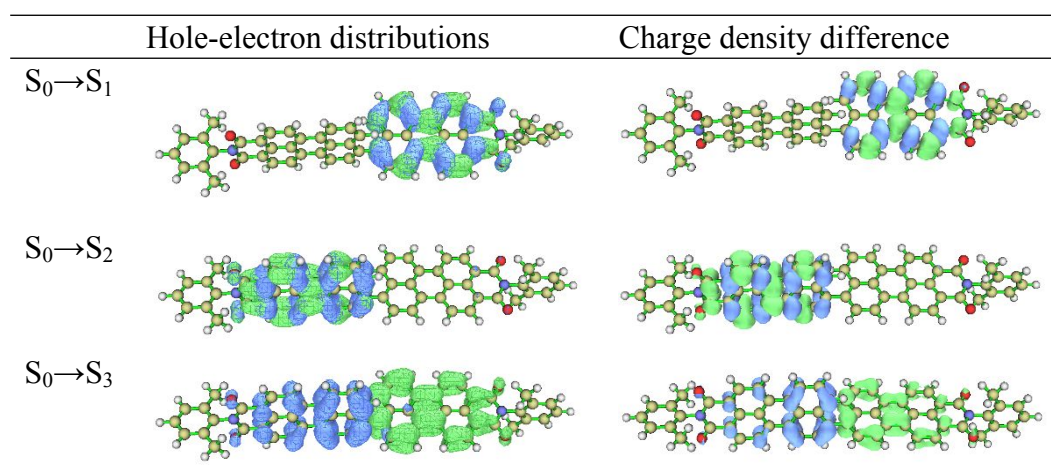

Figure S7. Distributions of hole and electron wave functions of  $S_1$ ,  $S_2$ ,  $S_3$  states and charge density difference for **PP** at optimized ground-state geometry in gas phase. The green and blue represent the electron and hole distributions, respectively.

Distributions of hole and electron wave functions of  $S_1$  and  $S_2$  can be used to examine the nature of  $S_0 \rightarrow S_1$  transition and  $S_0 \rightarrow S_2$  transition, suggesting that the first two singlet excited states belong to local excitation state from the left and right monomers, respectively. The slight overlap of the electron and hole distributions of  $S_3$  states at optimized ground geometry, in combination with calculated transition properties, indicate that the  $S_0 \rightarrow S_3$  is attributed to the ICT transition state.

## References

- (1) Geerts, Y.; Quante, H.; Platz, H.; Mahrt, R.; Hopmeier, M.; Böhm, A.; Müllen, K. Quaterylenebis(dicarboximide)s: near infrared absorbing and emitting dyes. *J. Mater. Chem.* **1998**, *8*, 2357-2369.
- (2) Khandelwal, H.; Mallia, A. R.; Cheriya, R. T.; Hariharan, M. Effect of temperature on symmetry breaking excited state charge separation: restoration of symmetry at elevated temperature. *Phys. Chem. Chem. Phys.* **2012**, *14*, 15282-15285.
- (3) Snellenburg, J. J.; Liptonok, S. P.; Seger, R.; Mullen, K. M.; van Stokkum, I. H. M. Glotaran: A Java-Based Graphical User Interface for the R Package TIMP. *J. Stat. Soft.* **2012**, *49*, 1-22.
- (4) van Stokkum, I. H. M.; Larsen, D. S.; van Grondelle, R. Global and target analysis of time-resolved spectra. *Biochim. Biophys. Acta* **2004**, *1657*, 82-104.
